# Supplementary material for: Particle size-independent induction of leucism in Drosophila melanogaster by silver: nano vs. micro
Source: Royal Society of Chemistry journal article supplement (doi:10.1039/c6mt00152a), 2016-01-01
Supplement: c6mt00152a1.pdf [file c6mt00152a1.pdf]

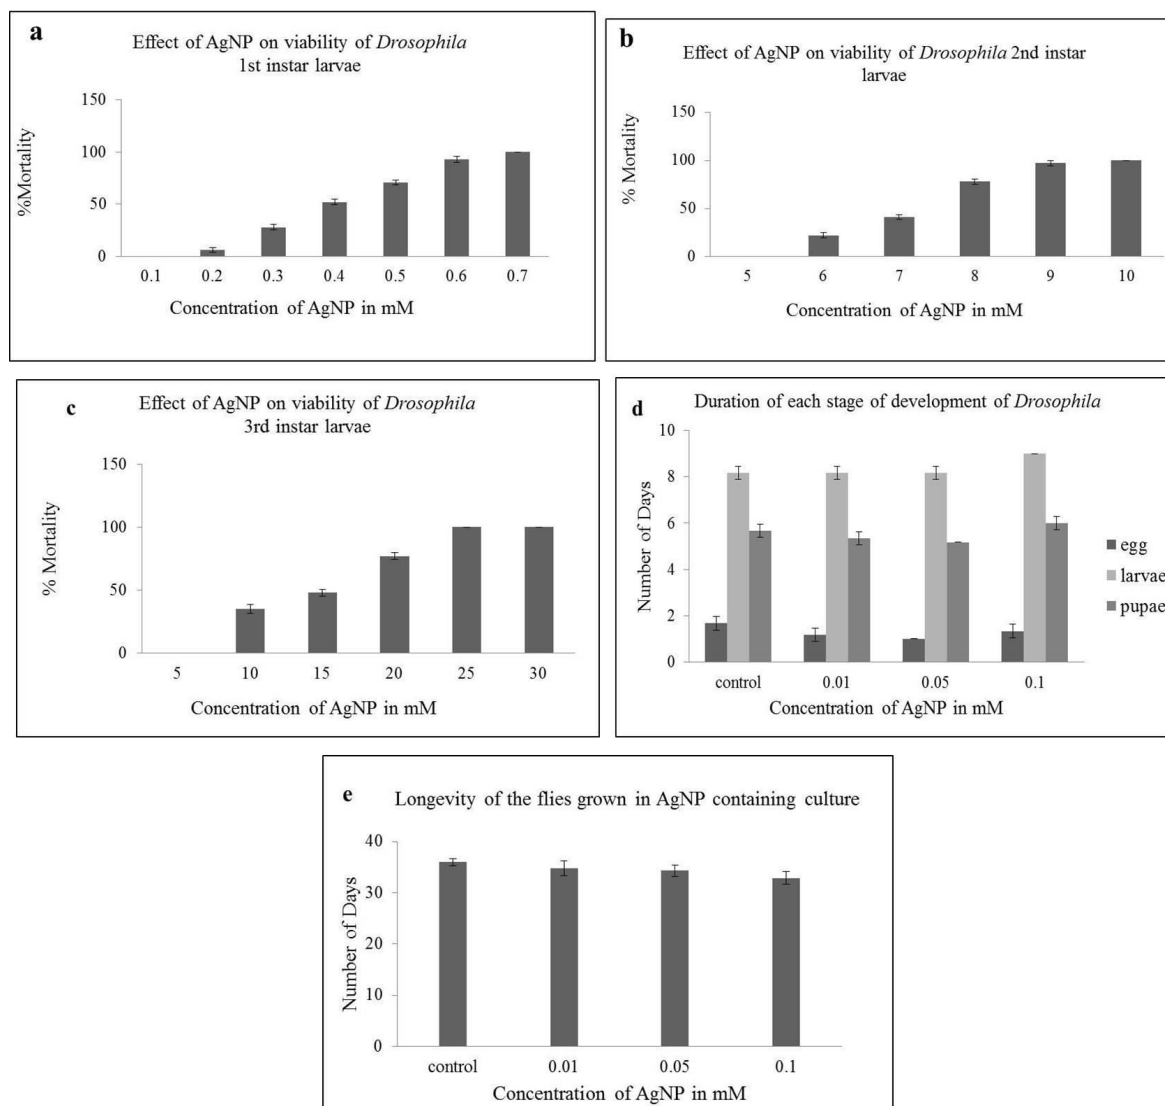

**Figure S1: Effect of AgNP on survival rate of *Drosophila*** (a) Mortality percentage of 1<sup>st</sup> instar larvae (b) Mortality percentage of 2<sup>nd</sup> instar larvae. (c) Mortality percentage of 3<sup>rd</sup> instar larvae. (d) Duration of each life cycle stage in response to AgNP treatment. (e) Total life span of AgNP treated flies.

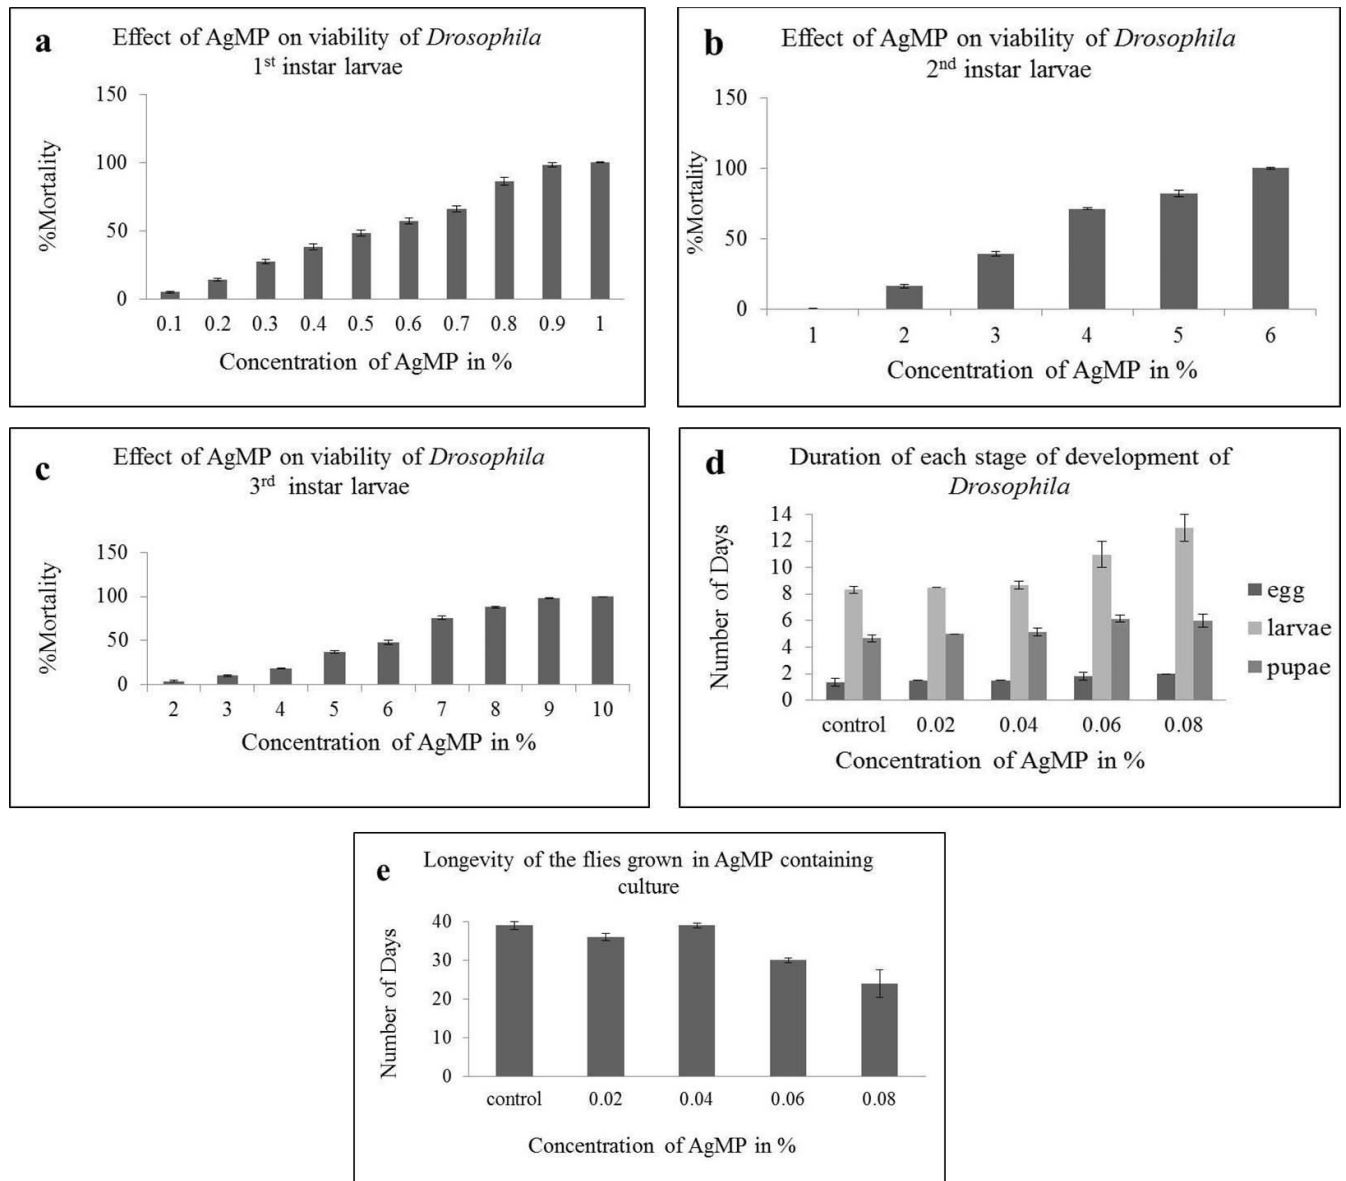

**Figure S2: Effect of AgMP on survival rate of *Drosophila*** (a) Mortality percentage of 1<sup>st</sup> instar larvae (b) Mortality percentage of 2<sup>nd</sup> instar larvae. (c) Mortality percentage of 3<sup>rd</sup> instar larvae. (d) Duration of each life cycle stage in response to AgMP treatment. (e) Total life span of AgMP treated flies.
